# Supplementary material for: Structure and evolution of alanine/serine decarboxylases and the engineering of theanine production
Source: eLife. 2024 Sep 17;12:RP91046. doi: 10.7554/eLife.91046 (PMC11407765; doi:10.7554/eLife.91046)
Supplement: Figure 2—source data 3. [file elife-91046-fig2-data3.xlsx]

## Sheet: Sheet1
CsAlaDC
Alanine concentration (mM)	velocity 1 (μmol/L/S)	velocity 2 (μmol/L/S)	velocity 3 (μmol/L/S)
1	0.709107	0.644097	0.649745
3	1.23984	1.37	1.27872
5	1.72725	1.33639	1.33605
10	1.54685	1.54796	1.45619
20	1.57217	1.48453	1.52909
AtSerDC
Serine concentration (mM)	velocity 1 (μmol/L/S)	velocity 2 (μmol/L/S)	velocity 3 (μmol/L/S)
1	2.75037	1.74152	2.60448
2	4.12028	4.20926	4.18136
4	5.61464	5.07897	5.9581
6	5.46914	5.63513	6.1082
10	5.58879	6.31665	7.51175
CsSerDC
Serine concentration (mM)	velocity 1 (μmol/L/S)	velocity 2 (μmol/L/S)	velocity 3 (μmol/L/S)
1	2.27684	1.89158	2.10649
2	3.81844	3.95958	4.5
3	4.79914	5.45986	5.58103
4	6.62053	4.80254	6.31572
5	6.41533	5.72645	6.4397
7	6.76704	6.36406	7.68286
10	6.86225	7.04984	8.67771
15	7.56233	5.93464	8.35959
