# Supplementary material for: Structure and evolution of alanine/serine decarboxylases and the engineering of theanine production
Source: eLife. 2024 Sep 17;12:RP91046. doi: 10.7554/eLife.91046 (PMC11407765; doi:10.7554/eLife.91046)
Supplement: Figure 3—source data 1. [file elife-91046-fig3-data1.xlsx]

## Sheet: Sheet1
Source Date for Figure 3H
mutation	1	2	3
CsAlaDC	100	100	100
CsAlaDCY336F	0	0	0
AtSerDC	100	100	100
AtSerDCY341F	0	1.47839	3.90521
