# Supplementary material for: Structure and evolution of alanine/serine decarboxylases and the engineering of theanine production
Source: eLife. 2024 Sep 17;12:RP91046. doi: 10.7554/eLife.91046 (PMC11407765; doi:10.7554/eLife.91046)
Supplement: Figure 4—source data 1. [file elife-91046-fig4-data1.xlsx]

## Sheet: Sheet1
Source Date for Figure 4E
		1	2	3
CsAlaDC		100	100	100
CsAlaDCF106Y		0	0	0
AtSDC		1.27216	0.617612	2.11618
AtSDCY111A		0	0	0
AtSDCY111F		187.641	188.078	117.354
AtSDCY111I		14.9043	12.9124	7.40685
AtSDCY111L		0.273579	0	0
AtSDCY111V		1.48687	1.37981	0
AtSDCY111W		0	0	0
Source Date for Figure 4F
		1	2	3
AtSDC		100	100	100
AtSDCY111A		0.503897	0.279075	0.43802
AtSDCY111F		38.4223	28.2758	23.6015
AtSDCY111I		3.21934	2.62478	4.56635
AtSDCY111L		0.669113	0.449075	0.594259
AtSDCY111V		1.65559	1.04786	1.25122
AtSDCY111W		1.4655	0.619745	0.839891
CsAlaDC		4.58357	2.76609	3.98637
CsAlaDCF106Y		5.13151	3.20024	3.65931
Source Date for Figure 4G and H
	Ethylamine content (mg/g)
WT	0	0	0
EV	0	0	0
AtSerDC	0	0	0
AtSerDCY111F	0.791378	0.836821	0.820211
CsAlaDC	3.1536	3.27686	3.34479
CsAlaDCF106Y	0	0	0
