# Supplementary material for: Structure and evolution of alanine/serine decarboxylases and the engineering of theanine production
Source: eLife. 2024 Sep 17;12:RP91046. doi: 10.7554/eLife.91046 (PMC11407765; doi:10.7554/eLife.91046)
Supplement: Figure 5—source data 1. [file elife-91046-fig5-data1.xlsx]

## Sheet: Sheet1
Source Date for Figure 5A
mutation	relative activity
WT	100
I66V	73.7936
K97R	99.3017
L110F	170.448
P114A	123.285
A166G	67.1629
E117Q	51.1887
A122S	37.6458
T315M	115.336
T345M	40.8288
Source Date for Figure 5B
	1	2	3
CsAlaDC	1	1	1
CsAlaDCL110F	2.06642	2.54114	1.69958
CsAlaDCP114A	1.6495	1.43371	1.68738
CsAlaDCL110F-P114A	2.2616	2.18336	2.54284
Source Date for Figure 5C
	1	2	3
CsAlaDC+MmGMAS	1	1	1
CsAlaDCL110F+MmGMAS	4.39315	4.66307	4.66274
CsAlaDCL110F-P114A+MmGMAS	6.72162	6.67998	6.7697
CsAlaDC+PsGs	1	1	1
CsAlaDCL110F+PsGs	2.2562	1.51348	1.31185
CsAlaDCL110F-P114A+PsGs	4.31724	4.41176	4.24986
